1 **Single-nucleus full-length RNA profiling in plants incorporates isoform**  
2 **information to facilitate cell type identification**

3 Yanping Long<sup>1,2,3†</sup>, Zhijian Liu<sup>1,2,3†</sup>, Jinbu Jia<sup>1,2,3†</sup>, Weipeng Mo<sup>1,2,3</sup>, Liang Fang<sup>1,4</sup>, Dongdong  
4 Lu<sup>1,2,3</sup>, Bo Liu<sup>1,2,3</sup>, Hong Zhang<sup>1,2,3</sup>, Wei Chen<sup>1,4</sup>, and Jixian Zhai<sup>1,2,3\*</sup>

5 **Affiliations:**

6 <sup>1</sup> Department of Biology, Southern University of Science and Technology, Shenzhen 518055,  
7 China;

8 <sup>2</sup> Institute of Plant and Food Science, Southern University of Science and Technology, Shenzhen  
9 518055, China;

10 <sup>3</sup> Key Laboratory of Molecular Design for Plant Cell Factory of Guangdong Higher Education  
11 Institutes, Southern University of Science and Technology, Shenzhen 518055, China;

12 <sup>4</sup> Academy for Advanced Interdisciplinary Studies, Southern University of Science and  
13 Technology, Shenzhen, China.

14

15

16 † These authors contributed equally to this work.

17 \* Correspondence: [zhaijx@sustech.edu.cn](mailto:zhaijx@sustech.edu.cn) (J.Z.)

18

## 19 **Abstract**

20 The broad application of large-scale single-cell RNA profiling in plants has been restricted by the  
21 prerequisite of protoplasting. We recently found that the Arabidopsis nucleus contains abundant  
22 polyadenylated mRNAs, many of which are incompletely spliced. To capture the isoform  
23 information, we combined 10x Genomics and Nanopore long-read sequencing to develop a  
24 protoplasting-free full-length single-nucleus RNA profiling method in plants. Our results  
25 demonstrated using Arabidopsis root that nuclear mRNAs faithfully retain cell identity information,  
26 and single-molecule full-length RNA sequencing could further improve cell type identification by  
27 revealing splicing status and alternative polyadenylation at single-cell level.

28

29 **Keywords:** Nanopore sequencing, Single-nucleus RNA-seq, Long-read

30

## 31 **Background**

32 High-throughput single-cell transcriptome studies have thrived in animal and human research in  
33 recent years[1-5]. However, despite successful single-cell characterization at a relatively low scale  
34 in maize developing germ cells[6] and rice mesophyll cells[7] using capillary-based approaches[8],  
35 only a handful of large-scale single-cell RNA studies using high-throughput platforms such as 10x  
36 Genomics or Drop-seq[9] have been published in plants[10], all of which profiled protoplasts  
37 generated from the root of Arabidopsis[11-17]. A major reason for this narrow focus of tissue type  
38 is that plant cells are naturally confined by cell walls, and protoplasting is required to release

39 individual cells – a procedure that is thoroughly tested for Arabidopsis roots[18-20] but remains  
40 to be difficult or impractical in many other tissues or species. Moreover, generating protoplasts  
41 from all cells uniformly is challenging given the complexity of plant tissues, and the enzymatic  
42 digestion and subsequent cleanup process during protoplast isolation may trigger the stress  
43 response and influence the transcriptome. Therefore, a protoplasting-free method is urgently  
44 needed to broaden the application of large-scale single-cell analysis in plants.

45  
46 We recently characterized full-length nascent RNAs in Arabidopsis and unexpectedly found a  
47 large number of polyadenylated mRNAs that are tightly associated with chromatin[21]. Since it is  
48 considerably easier and more widely applicable to perform nuclei isolation on various plant tissues  
49 than protoplasting, we set out to test if the polyadenylated RNAs in a single nucleus are sufficient  
50 to convey information on cell identity using the 10x Genomics high-throughput single-cell  
51 platform. Besides the standard Illumina short-read library which primarily captures abundance  
52 information, long-read sequencing has recently been incorporated into single-cell studies [22-24].  
53 To access the large number of intron-containing RNAs in plant nuclei, we also constructed a  
54 Nanopore-based long-read library and developed a bioinformatic pipeline named “snuupy” (single  
55 nucleus utility in python) to characterize mRNA isoforms in each nucleus ([Figure 1a](#),  
56 [Supplemental Figure 1](#)). This long-read single-nucleus strategy would enable plant biologists to  
57 bypass protoplasting, study RNA isoforms derived from alternative splicing and alternative

58 polyadenylation (APA) at the single-cell level, and provides additional dimensions of  
59 transcriptome complexity that could potentially further improve clustering of different cell types.

60

## 61 **Results and discussion**

62 Here, we chose to use the Arabidopsis root to validate the effectiveness of our protoplasting-free  
63 single-nuclei RNA sequencing approach because of the well-studied cell types[25] and the rich  
64 resource of single-cell data[11-16] of this tissue. We directly isolated nuclei by sorting from  
65 homogenized root tips of 10-day-old Arabidopsis seedlings without protoplasting ([Supplemental](#)  
66 [Figure 2](#)). The nuclei were fed to the 10x Genomics Chromium platform to obtain full-length  
67 cDNA templates labeled with nucleus-specific barcodes, which are subsequently divided into two  
68 equal parts and used for constructing Illumina short-read and Nanopore long-read libraries,  
69 respectively ([Figure 1a](#)).

70

71 From the Illumina library, we obtained a total of 1,186 single-nucleus transcriptomes covering  
72 18,913 genes, with median genes/nucleus at 810 and median UMIs/nucleus at 1131. It is worth  
73 noting that the proportion of intron-containing mRNAs is extremely high in plant nucleus - 54%  
74 compared to less than 2% in total RNAs[26] ([Figure 1b](#)). After generating the cell-gene abundance  
75 matrix from Illumina data, we used the Scanorama algorithm[27] to compare our dataset with  
76 several recently published root single-cell datasets from protoplasts[11, 12, 14-16]. The expression

77 abundance matrix from our single-nucleus dataset closely resembles the protoplasting-based  
78 single-cell dataset generated from the same tissue (10-days seedling, 0.5 mm primary root tips)[15]  
79 ([Supplemental Figure 3](#)). Next, we utilized an unbiased graph-based clustering method Louvain[28]  
80 and identified 14 distinct cell clusters ([Figure 1c](#)). We then applied a set of cell type-specific  
81 marker genes provided in a recent massive single-cell study of Arabidopsis roots[17] to annotate  
82 each cluster (See Methods, [Supplemental Table 1](#)). We were able to assign cell types to all 14  
83 clusters and identified 10 major root cell types previously reported ([Figure 1c](#), [Supplemental](#)  
84 [Figure 4](#)), with the signature transcripts for each cell type enriched in the corresponding cluster  
85 ([Supplemental Figure 5](#), [Supplemental Figure 6](#)). Consistent with previous reports[11-16], we also  
86 noticed that some cell types from our result are composed of multiple clusters, such as Stem Cell  
87 Niche (cluster 1, 4 and 12), mature Non-hair (cluster 2 and 6), Endodermis (cluster 5 and 8) ([Figure](#)  
88 [1c](#)), demonstrating additional heterogeneity (subcell types) within cell types. Moreover, we found  
89 the exact same subcell type marker genes of endodermis are enriched in each of its corresponding  
90 subcell types as shown in Zhang *et al.*[15] ([Supplemental Figure 7](#)), demonstrating the robustness  
91 of our single-nucleus data. Taken together, we demonstrated that transcriptomes of single nucleus  
92 are sufficient for cell type identification, and can be used as a reliable alternative to protoplasts.

93

94 As to the Nanopore data analysis, a key challenge is that the relatively low sequencing accuracy  
95 of Nanopore (~95% per base) makes it difficult to correctly recognize the cell barcodes and UMI

96 information on each Nanopore read. To solve this problem, Lebrigand *et al.* developed a method  
97 named Sicelore to use Illumina short reads generated from the same cDNA library as the guide to  
98 allocate Nanopore reads [22]. Sicelore searches for both polyA and adapter sequence and define  
99 the region between these two as the potential barcode and UMI. However, this algorithm relies on  
100 the recognition of polyA tail sequence generated by the Nanopore basecalling software, which  
101 tends to severely underestimate the length of polyA tail [29]. We tried to further improve Sicelore  
102 by developing a polyA independent algorithm (named snuupy), which searches for cell barcodes  
103 and UMIs in the unmapped region of Nanopore reads (See Methods and [Supplemental Figure 1](#),  
104 [Supplemental Figure 8a](#)). As the result, snuupy recovers 20% more reads from our Nanopore data  
105 compared to using Sicelore [22] ([Supplemental Figure 8b](#)). After snuupy processing, we obtained  
106 1,169 long-read single-nucleus transcriptomes from Nanopore data (compared to the 1,186 from  
107 Illumina data). The median UMI counts per nucleus (729) and the median gene counts per nucleus  
108 (563) from Nanopore data are ~64% and ~70% of the Illumina count, respectively, and highly  
109 consistent in all nuclei ([Figure 1d](#)). The clustering result using Nanopore abundance matrix closely  
110 resembles the one generated by Illumina data ([Figure 1e](#), [Figure 1f](#)), suggesting that Nanopore data  
111 itself is sufficient for cell-type classification, consistent with a recent large-scale single-cell  
112 analysis in human and mouse cells performed entirely with Nanopore data[22, 23].

113

114 The single-nucleus long-read Nanopore library provides isoform-level information such as  
115 splicing and APA, compared to Illumina library which only captures abundance information of  
116 transcripts. Therefore, we generated two additional isoform matrices to track splicing and APA in  
117 single nucleus, respectively ([Figure 2a and Supplemental Figure 9](#)), and combined them with the  
118 Illumina abundance matrix for a multilayer clustering, to test if these extra layers of information  
119 could improve cell type classification. Indeed, we found that the original cluster 2 (Mature Non-  
120 hair) and cluster 10 (Cortex) from Illumina data ([Figure 1c](#)) can be further separated into two  
121 subcell type clusters after the multilayer clustering ([Figure 2a](#)). As an example, from the Illumina  
122 data, transcripts of AT3G19010 are present in both subcell type 2.1 and 2.2 ([Figure 2b and 2c](#)),  
123 while the Nanopore data revealed a large difference at the splicing level of this gene between the  
124 two sub-clusters, with the second intron largely unspliced in subcell type 2.2 ([Figure 2d](#)). It is  
125 worth noting that, *JAZ7*, the top1 enriched gene in cluster 2.2 ([Figure 2e](#)), can regulate splicing  
126 during jasmonate response [30], implying a fascinating potential of cell-type specific regulation of  
127 splicing that could be investigated in the future.

128

## 129 **Conclusions**

130 According to previous reports in the animal system, especially for neurons and frozen materials,  
131 single nucleus generates comparable RNA to single cell and establishes a robust transcriptome  
132 atlas[31-34]. As a proof-of-concept demonstration in plant, our results showed that protoplasting-

133 free large-scale single-nucleus sequencing is sufficient for cell type classification and marker gene  
134 identification in Arabidopsis roots. As we are preparing this manuscript, several groups have also  
135 recently adopted the nuclei-based protoplasting-free strategy independently to investigate various  
136 plant tissues[35-39]. Eliminating protoplasting as a prerequisite would enable large-scale single-  
137 cell profiling on a wide range of tissues and plant species. Our method uniquely combined  
138 Nanopore-based full-length RNA sequencing method with single-nuclei sequencing to capture  
139 isoform diversity at single-nucleus level, which can facilitate cell type classification by providing  
140 extra layers of information in addition to abundance.

141

## 142 **Methods**

### 143 **Nuclei isolation from root tip of Arabidopsis**

144 The wild-type Arabidopsis seedlings (Col-0) were grown on 1/2 MS plates at 22 °C (16 h light/8  
145 h dark) for 10 days before harvest. The root tip region (5 mm) of seedlings were cut and transferred  
146 immediately into a 1.5 ml RNase-free Eppendorf tube kept in liquid nitrogen and were ground into  
147 fine powder by a 1000 µl pipette tip in the tube. The powder was then dissolved in 300 µl ice-cold  
148 Extraction Buffer (EB) - 0.4 M sucrose, 10 mM Tris-HCl pH 8.0, 10 mM MgCl<sub>2</sub>, 0.2% (w/v)  
149 Triton X-100, 1 mM dithiothreitol (DTT), 1× protease inhibitor (Roche), 0.4 U/µl RNase inhibitor  
150 (RNaseOUT, Thermo Fisher Scientific). Nonionic surfactant Triton X-100 is used to release nuclei,  
151 and avoid aggregation during FACS[40]. After gentle vortexing and inversion, the homogenate



152 was filtered through a 20  $\mu\text{m}$  cell strainer into a new tube. Another 400  $\mu\text{l}$  EB was added to the  
153 strainer to wash the remaining nuclei. After centrifugation at 4  $^{\circ}\text{C}$ , 2000 g for 5 min, the  
154 supernatant was removed carefully to avoid RNA contaminants from the cytoplasmic fraction. The  
155 pellet was washed twice at 4  $^{\circ}\text{C}$ , 2000 g, 5 min with 1 ml EB, and then resuspended in 500  $\mu\text{l}$  EB.  
156 For sorting, the nuclei were stained with 4,6-Diamidino-2-phenylindole (DAPI) and loaded into a  
157 flow cytometer with a 70  $\mu\text{m}$  nozzle. 1 ml EB was used as the collection buffer. A total of 40,000  
158 nuclei were sorted based on the DAPI signal and the nuclear size. To avoid aggregation, the sorted  
159 nuclei were pelleted at 4  $^{\circ}\text{C}$ , 2000 g, 5 min, and then resuspended in 100  $\mu\text{l}$  PBST buffer (1 $\times$  PBS  
160 with a low concentration of 0.025% Triton X-100). After checking the quality of nuclei and  
161 counting under a microscope using the DAPI channel, 5000 nuclei were transferred into a new  
162 tube with 500  $\mu\text{l}$  PBST buffer and centrifuged at 4  $^{\circ}\text{C}$ , 2000 g, 5 min. Then the pellet was  
163 resuspended in 20  $\mu\text{l}$  PBST buffer.

164

### 165 **Single nucleus RNA-seq library construction for Illumina and Nanopore sequencing**

166 Libraries were constructed according to the standard 10x Genomics protocol (Single Cell 3'  
167 Reagent Kits v2 User Guide) with modifications to accommodate Nanopore long-read sequencing.  
168 Briefly, nuclei suspension from the previous step (~5000 nuclei) were loaded onto the 10x  
169 Genomics Chip, and libraries were made using a 10x Chromium Single Cell 3' Solution V2 kit.  
170 To obtain full-length cDNA, we extend the elongation time during cDNA amplification from the  
171 standard 1 min to 2 minutes. Half of the cDNA template was used to construct Illumina library

172 according to the manufacturer's instruction and sequenced with Illumina NavoSeq (Read1:28  
173 bases + Read2:150 bases); the other half of the template was used to make Nanopore library using  
174 the Oxford Nanopore LSK-109 kit and sequenced on a MinION flow cell (R9.4.1).

175

### 176 **Illumina single-nuclei data analysis**

177 Raw reads were mapped to the TAIR10 reference genome by Cell Ranger (v3.1.0) using the default  
178 parameters. Cell Ranger (v3.1.0) only counts reads without introns; to accommodate the high  
179 proportion of intron-containing reads in our single-nucleus libraries, we removed the intron regions  
180 of each read and re-aligned reads to the reference genome by Cell Ranger to identify the nuclei  
181 barcode, UMI, and corresponding gene of each read ([Supplemental Figure 1](#)). For quality control  
182 purpose, genes expressed in less than three nuclei were discarded, and cells with gene counts more  
183 than 2300 or fewer than 350 were removed. The Illumina abundance matrix was subsequently  
184 analyzed using Scanpy package (v1.6.0)[41] with recommended parameters for normalization,  
185 log-transformation, and scaling. Then principal component analysis and Louvain algorithm were  
186 used on this abundance matrix for clustering. Next, we used the marker genes for different cell  
187 types identified in a massive single-cell root data [17] ([Supplemental Table 1](#)) to annotate the cell  
188 type of each cluster. We first calculate the cell score of each cell type for all cells based on the  
189 enrichment degree of a given marker gene set in a given cell, as previously described method [42].  
190 If the highest score exceeds zero, the cell is assigned to the corresponding cell type; otherwise it

191 is assigned as unknown (Supplemental Figure 4a). Then each cluster was annotated as the cell type  
192 with the highest proportion (Supplemental Figure 4b), and we used developmental stage specific  
193 genes identified in the massive single-cell root data [17] (Supplemental Table 1) to further annotate  
194 the clusters resenting non-hair cells as either mature non-hair or elongating non-hair cells  
195 (Supplemental Figure 4c).

196 Five previously published single-cell RNA-seq data of protoplasted Arabidopsis roots using 10x  
197 Genomics platform were collected from public databases[11, 12, 14-16]. We use Scanorama[27]  
198 to remove batch effects and calculate the alignment score between different datasets.

199

## 200 **Nanopore single-nuclei data processing and isoform analysis**

201 Raw Nanopore data were basecalled using Guppy (v3.6.0) with the parameters “--c  
202 dna\_r9.4.1\_450bps\_hac.cfg --fast5\_out”. The basecalled reads were mapped to the TAIR10  
203 genome by minimap2 (v2.17) with the parameters “-ax splice --secondary=no -uf --MD --sam-hit-  
204 only”, and the multi-mapped reads as well as potential chimeric reads (either the 5’ or 3’ unmapped  
205 region is great than 150 nt) were filtered out. The nucleus barcodes and UMI sequences in  
206 Nanopore reads were extracted from the unmapped sequences of each read via aligning against all  
207 barcode/UMI combinations identified from the Illumina library made from the same full-length  
208 cDNA templates, a strategy inspired by the algorithm Sicelore[22]. To reduce search space, we  
209 divided the genome into non-overlapped 500-bp bins, and only matched the Illumina barcode/UMI

210 combinations from the bins overlapping or adjacent to the mapping genome region of specific  
211 Nanopore read ([Supplemental Figure 6](#)). To speed up the alignment process, we first used the  
212 heuristic algorithm Blastn (v2.10.0) to find potential seed regions with parameters “-word\_size 7  
213 -gapopen 0 -gapextend 2 -penalty -1 -reward 1” and then re-aligned the seed regions by the more  
214 accurate Smith-Waterman local alignment algorithm. Our pipeline assigns the closest barcode-  
215 UMI match (i.e. with minimal mismatch/gap) to each Nanopore read, allowing up to three base  
216 errors (mismatch/gap) for either barcode or UMI, and remove reads with multiple best matching  
217 barcode-UMIs. After the barcode and UMI assignment, the Nanopore reads with the same UMI  
218 were used to generate an error-corrected consensus sequence of the original RNA molecule by  
219 poaV2[43] and racon[44]. PAS isoform annotation and the intron splicing status of Nanopore read  
220 were determined as previously described[21, 45]. The resulted APA and splicing matrices for all  
221 nuclei were merged with Illumina abundance matrix and analyzed by Scanpy.

222 The same Cell Ranger result is used as the input file for Sicelore. Except that the maximum edit  
223 distance during Barcode and Umi assignment is forcibly set to 3, the remaining parameters are the  
224 same as the official example (<https://github.com/ucagenomix/sicelore/blob/master/quickrun.sh>).

225

## 226 **Data and software Availability**

227 All data generated in this study were deposited in NCBI with accession PRJNA664874  
228 (<https://www.ncbi.nlm.nih.gov/bioproject/PRJNA664874>). The snuupy package for single-

229 nucleus Nanopore data processing can be accessed at [https://github.com/ZhaiLab-](https://github.com/ZhaiLab-SUSTech/snuupy)  
230 [SUSTech/snuupy](https://github.com/ZhaiLab-SUSTech/snuupy).

231

## 232 **Acknowledgments**

233 Group of J.Z. is supported by the National Key R&D Program of China Grant (2019YFA0903903),  
234 the Program for Guangdong Introducing Innovative and Entrepreneurial Teams (2016ZT06S172),  
235 the Shenzhen Sci-Tech Fund (KYTDPT20181011104005), and Key Laboratory of Molecular  
236 Design for Plant Cell Factory of Guangdong Higher Education Institutes (2019KSYS006).

237

## 238 **Author Contributions**

239 Y.L., L.F., D.L. and B.L. performed the experiments. Y.L., Z.L., J.J., W.M. and H.Z. analyzed the  
240 data. J.Z., W.C. and J.J. oversaw the study. All authors wrote and revised the manuscript.

241 **References**

242

- 243 1. Chen X, Teichmann SA, Meyer KB: **From tissues to cell types and back: single-cell gene**  
244 **expression analysis of tissue architecture.** *Annu. Rev. Biomed. Eng.* 2018, **1**: 29-51.
- 245 2. Lein E, Borm LE, Linnarsson S: **The promise of spatial transcriptomics for**  
246 **neuroscience in the era of molecular cell typing.** *Science* 2017, **358**:64-69.
- 247 3. Kelsey G, Stegle O, Reik WJS: **Single-cell epigenomics: Recording the past and**  
248 **predicting the future.** *Science* 2017, **358**:69-75.
- 249 4. Stubbington MJ, Rozenblatt-Rosen O, Regev A, Teichmann SA: **Single-cell**  
250 **transcriptomics to explore the immune system in health and disease.** *Science* 2017,  
251 **358**:58-63.
- 252 5. Svensson V, Vento-Tormo R, Teichmann SA: **Exponential scaling of single-cell RNA-**  
253 **seq in the past decade.** *Nat. Protoc.* 2018, **13**:599-604.
- 254 6. Nelms B, Walbot V: **Defining the developmental program leading to meiosis in maize.**  
255 *Science* 2019, **364**:52-56.
- 256 7. Han Y, Chu X, Yu H, Ma Y-K, Wang X-J, Qian W, Jiao Y: **Single-cell transcriptome**  
257 **analysis reveals widespread monoallelic gene expression in individual rice mesophyll**  
258 **cells.** *Sci. Bull.* 2017, **62**:1304-1314.
- 259 8. Luo C, Fernie AR, Yan J: **Single-Cell Genomics and Epigenomics: Technologies and**  
260 **Applications in Plants.** *Trends Plant Sci.* 2020, **10**:1030-1040.
- 261 9. Macosko EZ, Basu A, Satija R, Nemesh J, Shekhar K, Goldman M, Tirosh I, Bialas AR,  
262 Kamitaki N, Martersteck EM: **Highly parallel genome-wide expression profiling of**  
263 **individual cells using nanoliter droplets.** *Cell* 2015, **161**:1202-1214.
- 264 10. Rich-Griffin C, Stechemesser A, Finch J, Lucas E, Ott S, Schafer P: **Single-Cell**  
265 **Transcriptomics: A High-Resolution Avenue for Plant Functional Genomics.** *Trends*  
266 *Plant Sci.* 2020, **25**:186-197.
- 267 11. Denyer T, Ma X, Klesen S, Scacchi E, Nieselt K, Timmermans MC: **Spatiotemporal**  
268 **developmental trajectories in the Arabidopsis root revealed using high-throughput**  
269 **single-cell RNA sequencing.** *Dev. Cell* 2019, **48**:840-852. e845.
- 270 12. Jean-Baptiste K, McFaline-Figueroa JL, Alexandre CM, Dorrity MW, Saunders L, Bubb  
271 KL, Trapnell C, Fields S, Queitsch C, Cuperus JT: **Dynamics of gene expression in single**  
272 **root cells of Arabidopsis thaliana.** *Plant Cell* 2019, **31**:993-1011.
- 273 13. Shulse CN, Cole BJ, Ciobanu D, Lin J, Yoshinaga Y, Gouran M, Turco GM, Zhu Y,  
274 O'Malley RC, Brady SM: **High-throughput single-cell transcriptome profiling of plant**  
275 **cell types.** *Cell Rep.* 2019, **27**:2241-2247. e2244.
- 276 14. Ryu KH, Huang L, Kang HM, Schiefelbein J: **Single-Cell RNA Sequencing Resolves**  
277 **Molecular Relationships Among Individual Plant Cells.** *Plant Physiol.* 2019, **179**:1444-  
278 1456.

- 279 15. Zhang T-Q, Xu Z-G, Shang G-D, Wang J-W: **A single-cell RNA sequencing profiles**  
280 **the developmental landscape of Arabidopsis root.** *Mol. Plant* 2019, **12**:648-660.
- 281 16. Wendrich JR, Yang B, Vandamme N, Verstaen K, Smet W, Van de Velde C, Minne M,  
282 Wybouw B, Mor E, Arents HEJS: **Vascular transcription factors guide plant epidermal**  
283 **responses to limiting phosphate conditions.** *Science* 2020, **370**:eaay4970.
- 284 17. Shahan R, Hsu C-W, Nolan TM, Cole BJ, Taylor IW, Vlot AHC, Benfey PN, Ohler U: **A**  
285 **single cell Arabidopsis root atlas reveals developmental trajectories in wild type and**  
286 **cell identity mutants.** *bioRxiv* 2020:2020.2006.2029.178863.
- 287 18. Birnbaum K, Shasha DE, Wang JY, Jung JW, Lambert GM, Galbraith DW, Benfey PN: **A**  
288 **gene expression map of the Arabidopsis root.** *Science* 2003, **302**:1956-1960.
- 289 19. Brady SM, Orlando DA, Lee J-Y, Wang JY, Koch J, Dinneny JR, Mace D, Ohler U, Benfey  
290 PN: **A high-resolution root spatiotemporal map reveals dominant expression patterns.**  
291 *Science* 2007, **318**:801-806.
- 292 20. Li S, Yamada M, Han X, Ohler U, Benfey PN: **High-resolution expression map of the**  
293 **Arabidopsis root reveals alternative splicing and lincRNA regulation.** *Dev. Cell* 2016,  
294 **39**:508-522.
- 295 21. Jia J, Long Y, Zhang H, Li Z, Liu Z, Zhao Y, Lu D, Jin X, Deng X, Xia R, *et al*: **Post-**  
296 **transcriptional splicing of nascent RNA contributes to widespread intron retention in**  
297 **plants.** *Nat. Plants* 2020, **6**:780-788.
- 298 22. Lebrigand K, Magnone V, Barbry P, Waldmann R: **High throughput error corrected**  
299 **Nanopore single cell transcriptome sequencing.** *Nat. Commun.* 2020, **11**:1-8.
- 300 23. Volden R, Vollmers C: **Highly Multiplexed Single-Cell Full-Length cDNA Sequencing**  
301 **of human immune cells with 10X Genomics and R2C2.** *bioRxiv* 2020.
- 302 24. Gupta I, Collier PG, Haase B, Mahfouz A, Joglekar A, Floyd T, Koopmans F, Barres B,  
303 Smit AB, Sloan SA: **Single-cell isoform RNA sequencing characterizes isoforms in**  
304 **thousands of cerebellar cells.** *Nat. Biotechnol.* 2018, **36**:1197-1202.
- 305 25. Drapek C, Sparks EE, Benfey PN: **Uncovering gene regulatory networks controlling**  
306 **plant cell differentiation.** *Trends Genet.* 2017, **33**:529-539.
- 307 26. Parker MT, Knop K, Sherwood AV, Schurch NJ, Mackinnon K, Gould PD, Hall AJ, Barton  
308 GJ, Simpson GG: **Nanopore direct RNA sequencing maps the complexity of**  
309 **Arabidopsis mRNA processing and m6A modification.** *Elife* 2020, **9**:e49658.
- 310 27. Hie B, Bryson B, Berger B: **Efficient integration of heterogeneous single-cell**  
311 **transcriptomes using Scanorama.** *Nat. biotechnol.* 2019, **37**:685-691.
- 312 28. Blondel VD, Guillaume J-L, Lambiotte R, Lefebvre E: **Fast unfolding of communities in**  
313 **large networks.** *J. Stat. Mech. Theory Exp.* 2008, **2008**:P10008.
- 314 29. Krause M, Niazi AM, Labun K, Cleuren YNT, Müller FS, Valen E: **tailfinder: alignment-**  
315 **free poly (A) length measurement for Oxford Nanopore RNA and DNA sequencing.**  
316 *RNA* 2019, **25**:1229-1241.

- 317 30. Feng G, Yoo M-J, Davenport R, Boatwright JL, Koh J, Chen S, Barbazuk WB: **Jasmonate**  
318 **induced alternative splicing responses in Arabidopsis.** *Plant Direct.* 2020, **4**:e00245.
- 319 31. Habib N, Li Y, Heidenreich M, Swiech L, Avraham-Davidi I, Trombetta JJ, Hession C,  
320 Zhang F, Regev A: **Div-Seq: Single-nucleus RNA-Seq reveals dynamics of rare adult**  
321 **newborn neurons.** *Science* 2016, **353**:925.
- 322 32. Habib N, Avraham-Davidi I, Basu A, Burks T, Shekhar K, Hofree M, Choudhury SR,  
323 Aguet F, Gelfand E, Ardlie K, et al: **Massively parallel single-nucleus RNA-seq with**  
324 **DroNc-seq.** *Nat. Methods* 2017, **14**:955-958.
- 325 33. Ding J, Adiconis X, Simmons SK, Kowalczyk MS, Hession CC, Marjanovic ND, Hughes  
326 TK, Wadsworth MH, Burks T, Nguyen LT, et al: **Systematic comparison of single-cell**  
327 **and single-nucleus RNA-sequencing methods.** *Nat. Biotechnol.* 2020, **38**:737-746.
- 328 34. Krienen FM, Goldman M, Zhang Q, C. H. del Rosario R, Florio M, Machold R, Saunders  
329 A, Levandowski K, Zaniewski H, Schuman B, et al: **Innovations present in the primate**  
330 **interneuron repertoire.** *Nature* 2020, **586**:262-269.
- 331 35. Thibivilliers S, Anderson D, Libault M: **Isolation of Plant Root Nuclei for Single Cell**  
332 **RNA Sequencing.** *Curr. Protoc. Mol. Biol.* 2020, **5**:e20120.
- 333 36. Picard CL, Povilus RA, Williams BP, Gehring M: **Single nucleus analysis of Arabidopsis**  
334 **seeds reveals new cell types and imprinting dynamics.** *bioRxiv*  
335 2020:2020.2008.2025.267476.
- 336 37. Tian C, Du Q, Xu M, Du F, Jiao Y: **Single-nucleus RNA-seq resolves spatiotemporal**  
337 **developmental trajectories in the tomato shoot apex.** *bioRxiv*  
338 2020:2020.2009.2020.305029.
- 339 38. Farmer A, Thibivilliers S, Ryu KH, Schiefelbein J, Libault M: **The impact of chromatin**  
340 **remodeling on gene expression at the single cell level in Arabidopsis thaliana.** *bioRxiv*  
341 2020:2020.2007.2027.223156.
- 342 39. Sunaga-Franze DY, Muino JM, Braeuning C, Xu X, Zong M, Smaczniak C, Yan W,  
343 Fischer C, Vidal R, Kliem M, et al: **Single-nuclei RNA-sequencing of plants.** *bioRxiv*  
344 2020:2020.2011.2014.382812.
- 345 40. Krishnaswami SR, Grindberg RV, Novotny M, Venepally P, Lacar B, Bhutani K, Linker  
346 SB, Pham S, Erwin JA, Miller JA, et al: **Using single nuclei for RNA-seq to capture the**  
347 **transcriptome of postmortem neurons.** *Nat. Protoc.* 2016, **11**:499-524.
- 348 41. Wolf FA, Angerer P, Theis FJ: **SCANPY: large-scale single-cell gene expression data**  
349 **analysis.** *Genome Biology* 2018, **19**:15.
- 350 42. Tirosh I, Izar B, Prakadan SM, Wadsworth MH, Treacy D, Trombetta JJ, Rotem A,  
351 Rodman C, Lian C, Murphy G: **Dissecting the multicellular ecosystem of metastatic**  
352 **melanoma by single-cell RNA-seq.** *Science* 2016, **352**:189-196.
- 353 43. Lee C, Grasso C, Sharlow MF: **Multiple sequence alignment using partial order graphs.**  
354 *Bioinformatics* 2002, **18**:452-464.



- 355 44. Vaser R, Sović I, Nagarajan N, Šikić M: **Fast and accurate de novo genome assembly**  
356 **from long uncorrected reads.** *Genome Res.* 2017, **27**:737-746.
- 357 45. Wu X, Liu M, Downie B, Liang C, Ji G, Li QQ, Hunt AG: **Genome-wide landscape of**  
358 **polyadenylation in Arabidopsis provides evidence for extensive alternative**  
359 **polyadenylation.** *Proc Natl Acad Sci U S A.* 2011, **108**:12533-12538.
- 360
- 361

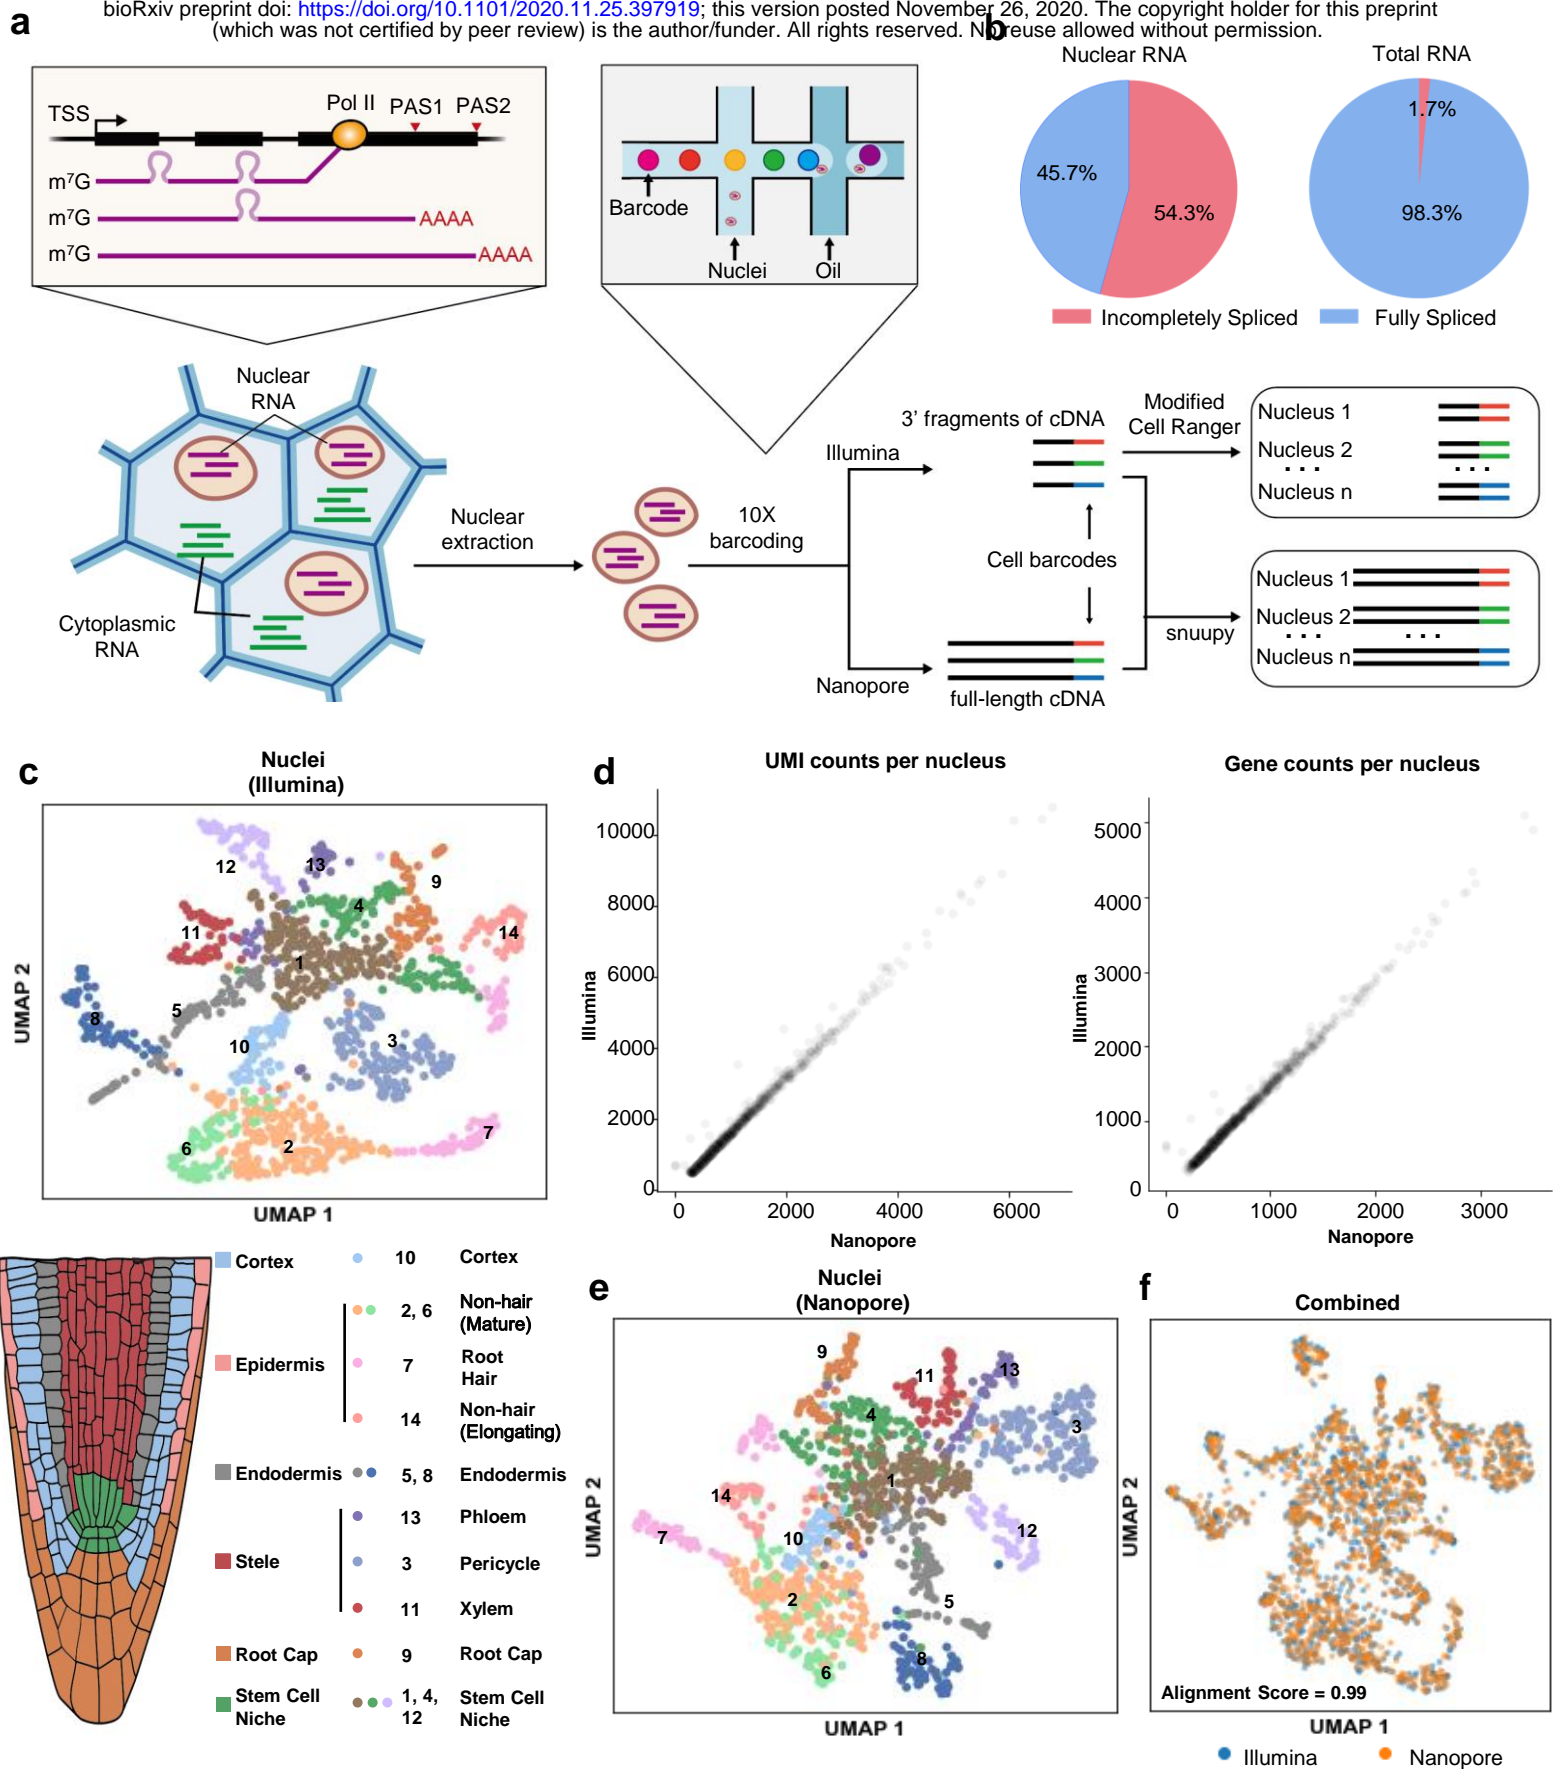

**Figure 1. Protoplasting-free large-scale single-nucleus RNA-seq reveals the diverse cell types in Arabidopsis root.** **a**, Schematic diagram of protoplasting-free single-nucleus RNA-seq. **b**, Incompletely spliced and fully spliced fractions of the Nanopore reads from our single-nucleus RNA library, compared with a previously published total RNA nanopore library[26]. **c**, UMAP visualization of the root cell types clustered using Illumina single-nucleus data (upper panel), and cartoon illustration of major cell types in Arabidopsis root tip (lower panel). **d**, Numbers of UMIs (left) and genes (right) detected in each nucleus from the Illumina and Nanopore data. **e**, UMAP visualization of the root cell types clustered using abundance information from the Nanopore single-nucleus data. The cell color is the same as in Figure 1c. **f**, UMAP visualization of the integration of two datasets. The batch effect is removed by Scanorama. Alignment score is calculated by Scanorama[27] and in the range from 0 to 1. Higher alignment score indicates higher similarity between a pair of datasets.

**a**

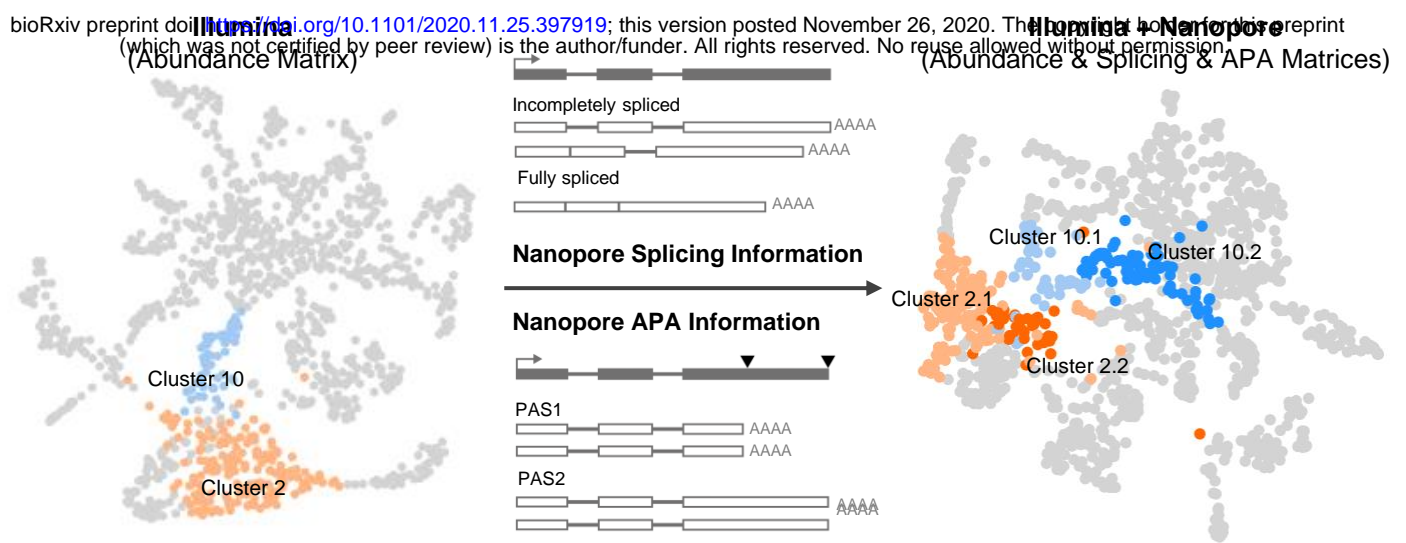

**b**

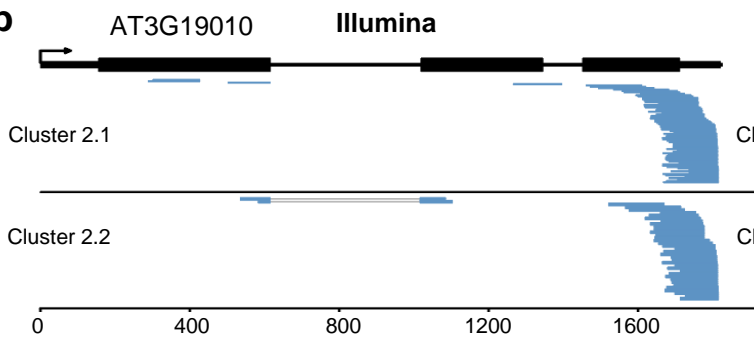

**c**

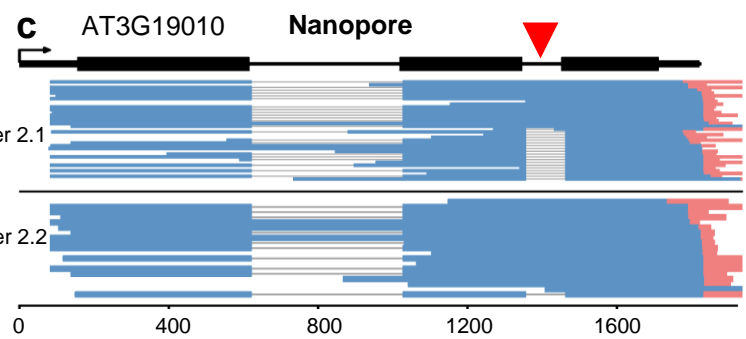

**d**

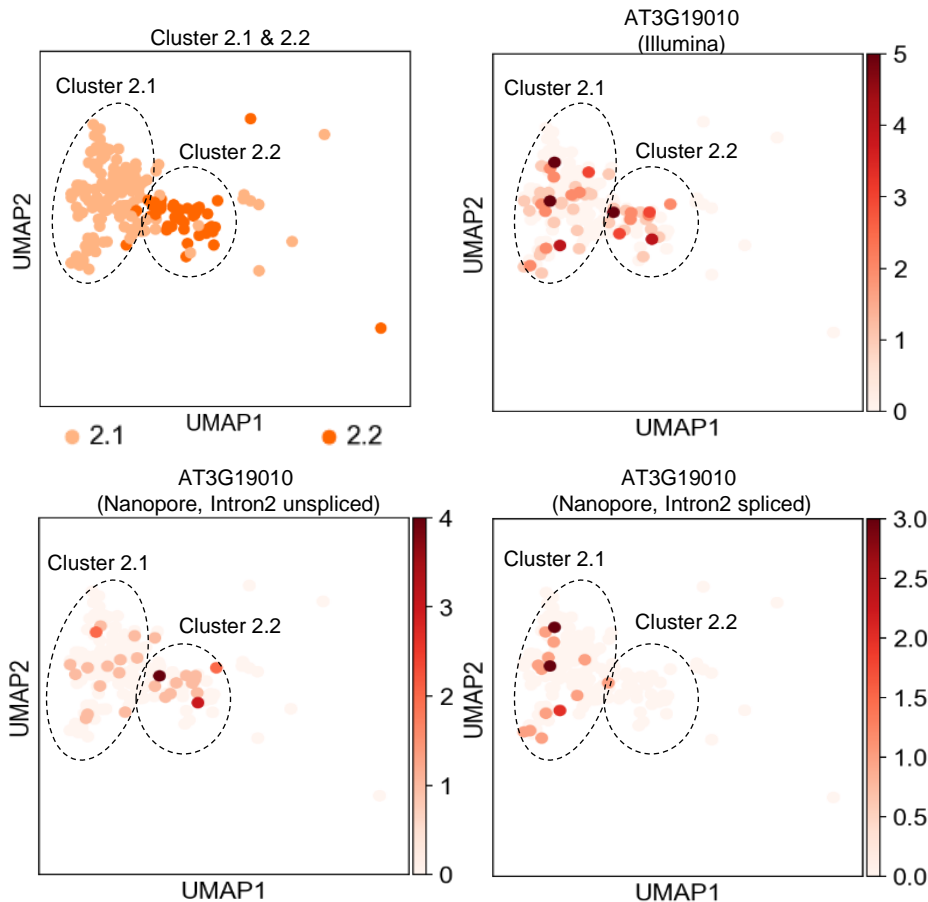

**e**

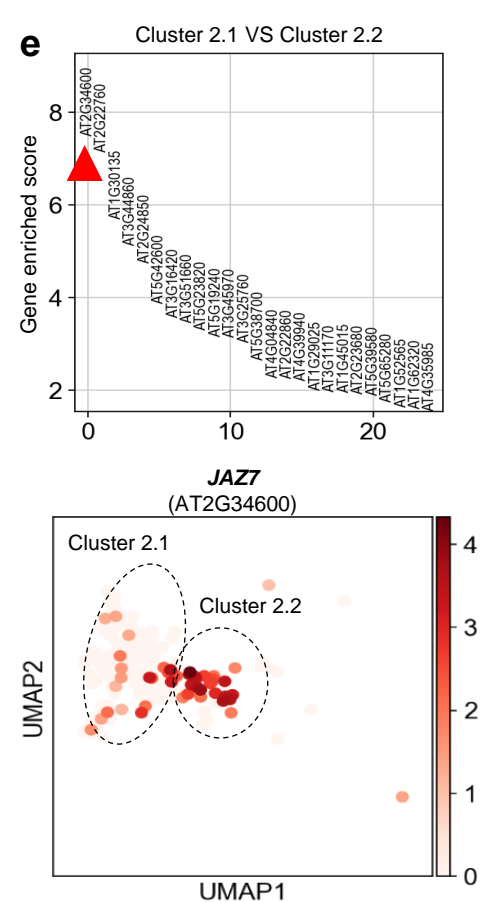

**Figure 2. Nanopore long read single-nucleus RNA-seq improves cell type identification.** **a**, Multi-layer matrices combining Illumina abundance matrix with Nanopore splicing and APA information improve cell type identification. **b,c**, Genome-browser plot of Illumina reads(**b**) and Nanopore reads(**c**) aligned to gene AT3G19010. The second intron of AT3G1910 shows different splicing patterns between Cluster 2.1 and Cluster 2.2. The red arrowhead indicates the second intron. Red bar at the 3' end of Nanopore reads (blue) indicates the Poly(A) tail. **d**, UMAP visualization shows the abundance distribution of AT3G19010 as well as the differential splicing of the second intron between Cluster 2.1 and Cluster 2.2. **e**, The top 25 genes enriched in Cluster 2.2 are ranked by enriched score compared to Cluster 2.1 (upper panel) and UMAP visualization shows the abundance distribution of the most enriched gene *JAZ7* (lower panel). The enriched score is calculated using *rank\_genes\_groups* function of Scanpy. The red arrowhead indicates the most enriched gene in Cluster 2.2.

## Scheme of snuopy

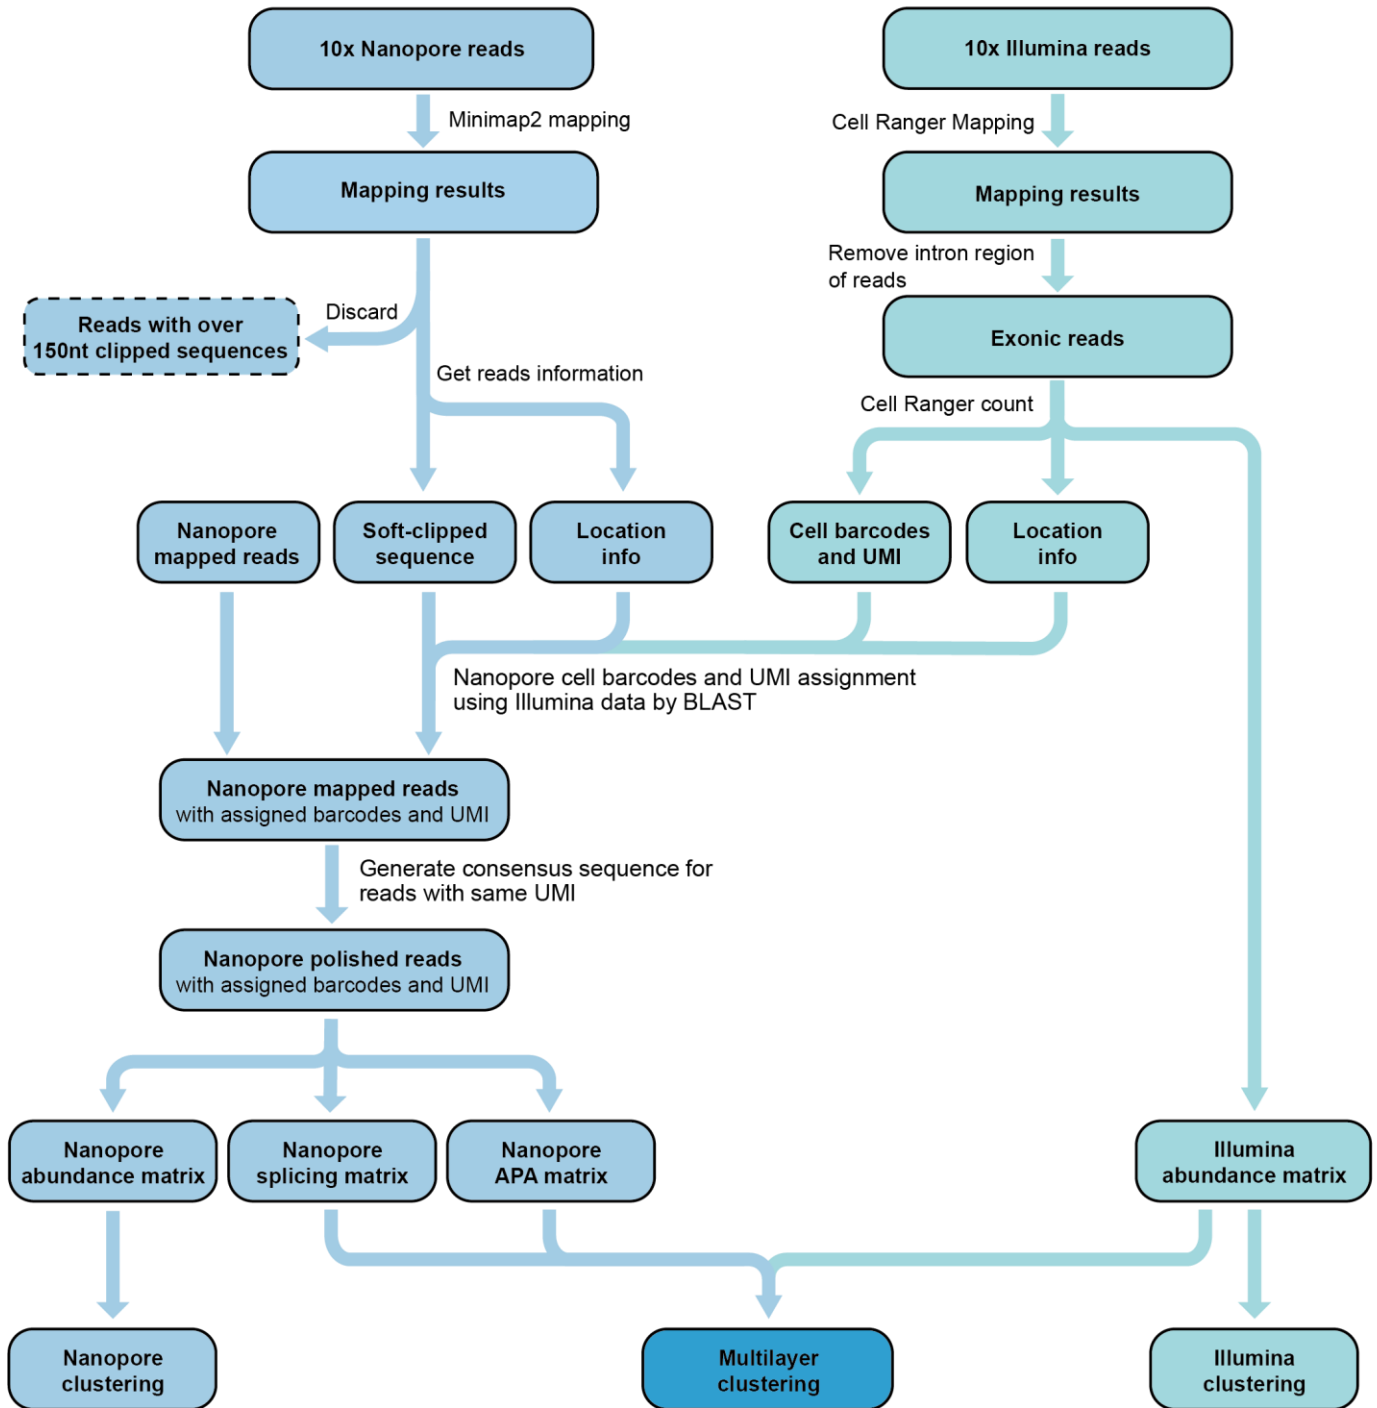

Supplemental Figure 1. Schematic diagram of snuopy bioinformatic pipeline.

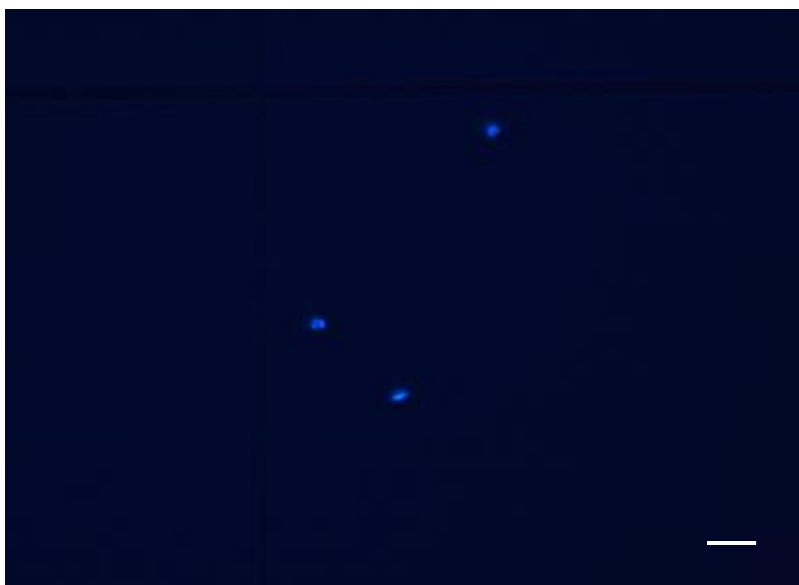

**Supplemental Figure 2. The sorted nuclei were observed under a microscopy with DAPI staining. Bar = 20  $\mu$ m.**

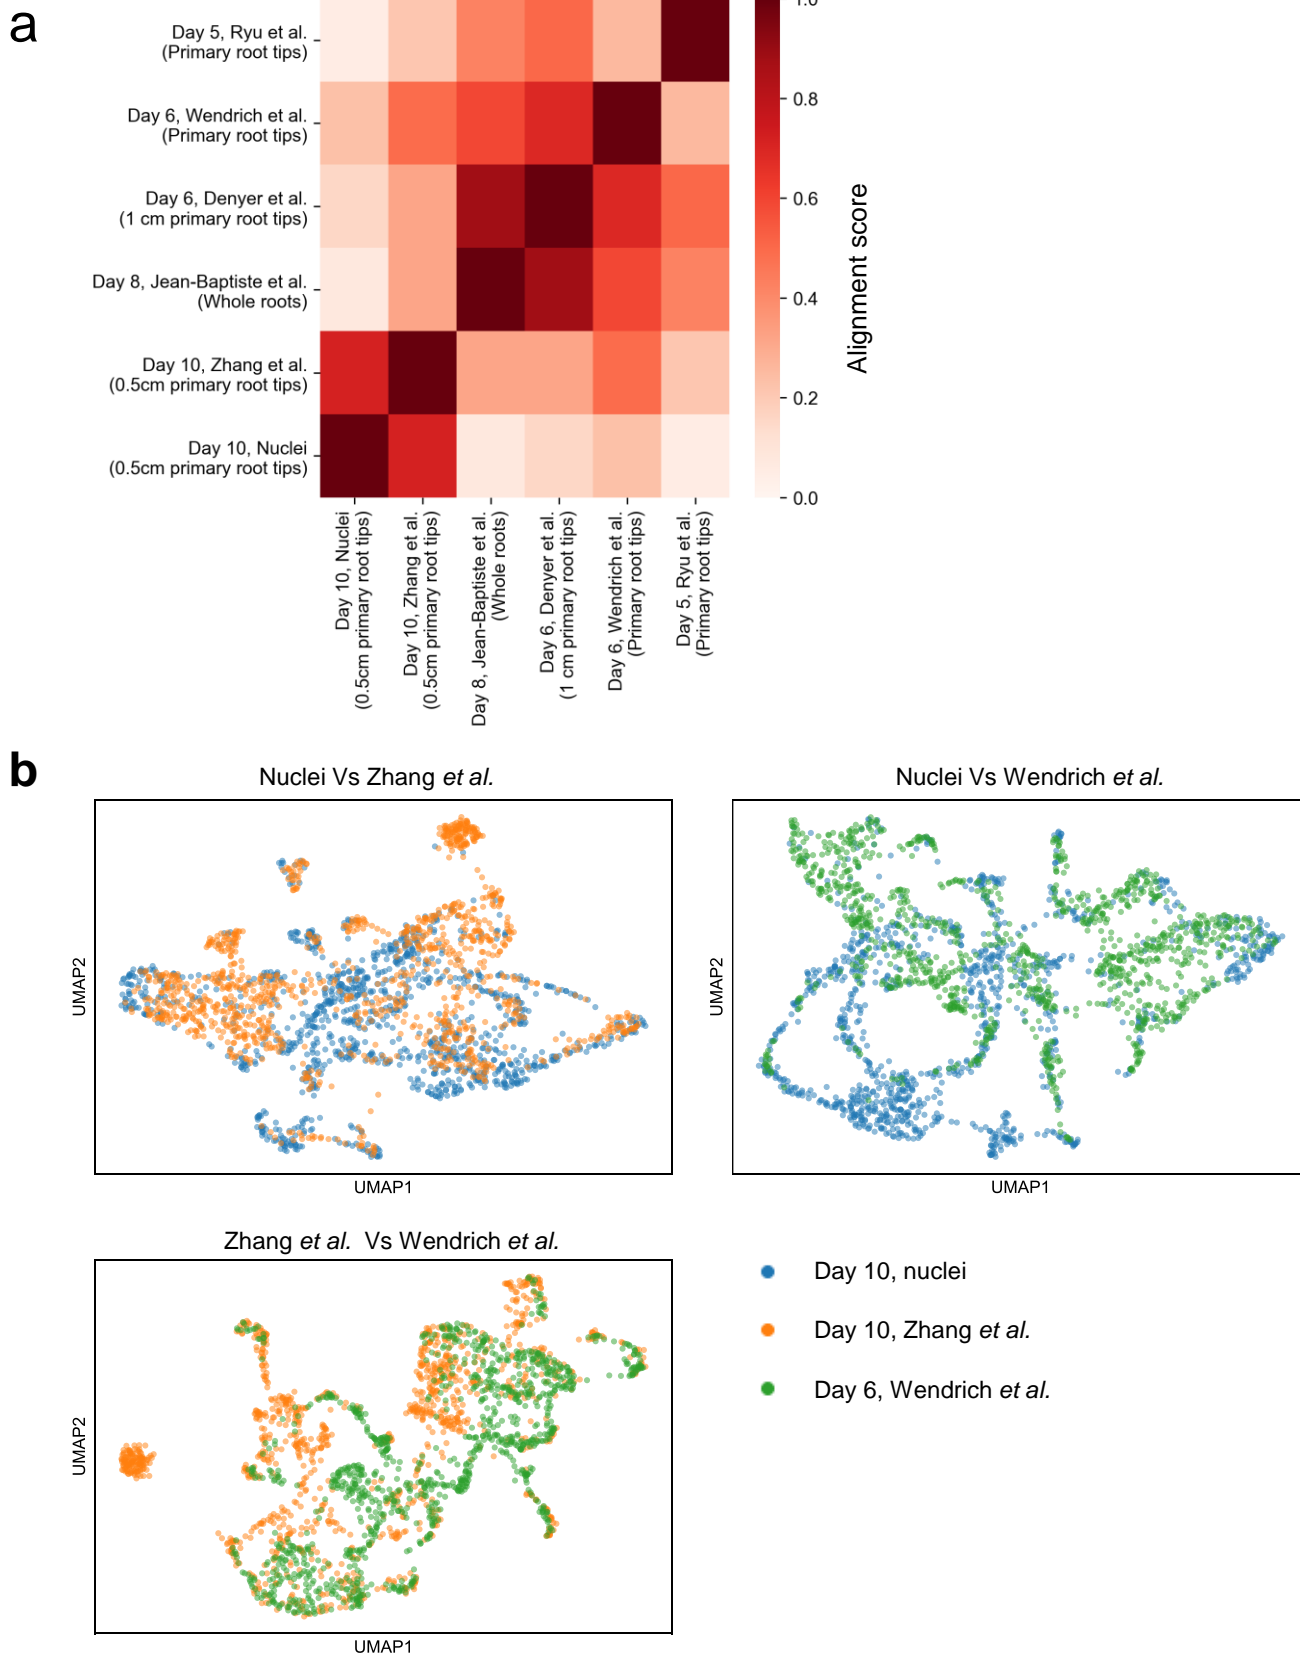

**Supplemental Figure 3. Dataset generated by snRNA-seq is consistent with protoplast-based scRNA-seq.** **a**, Heatmap represents alignment score between the single-nucleus data and single-cell datasets generated from 10x Genomics platform. Alignment score is calculated by Scanorama[27]. Higher alignment score indicates higher similarity between a pair of datasets. **b**, Pairwise integration of three single cell/nucleus datasets. The batch effect is removed by Scanorama. The expression matrix is downsampled to the same dimension as the single-nucleus data.

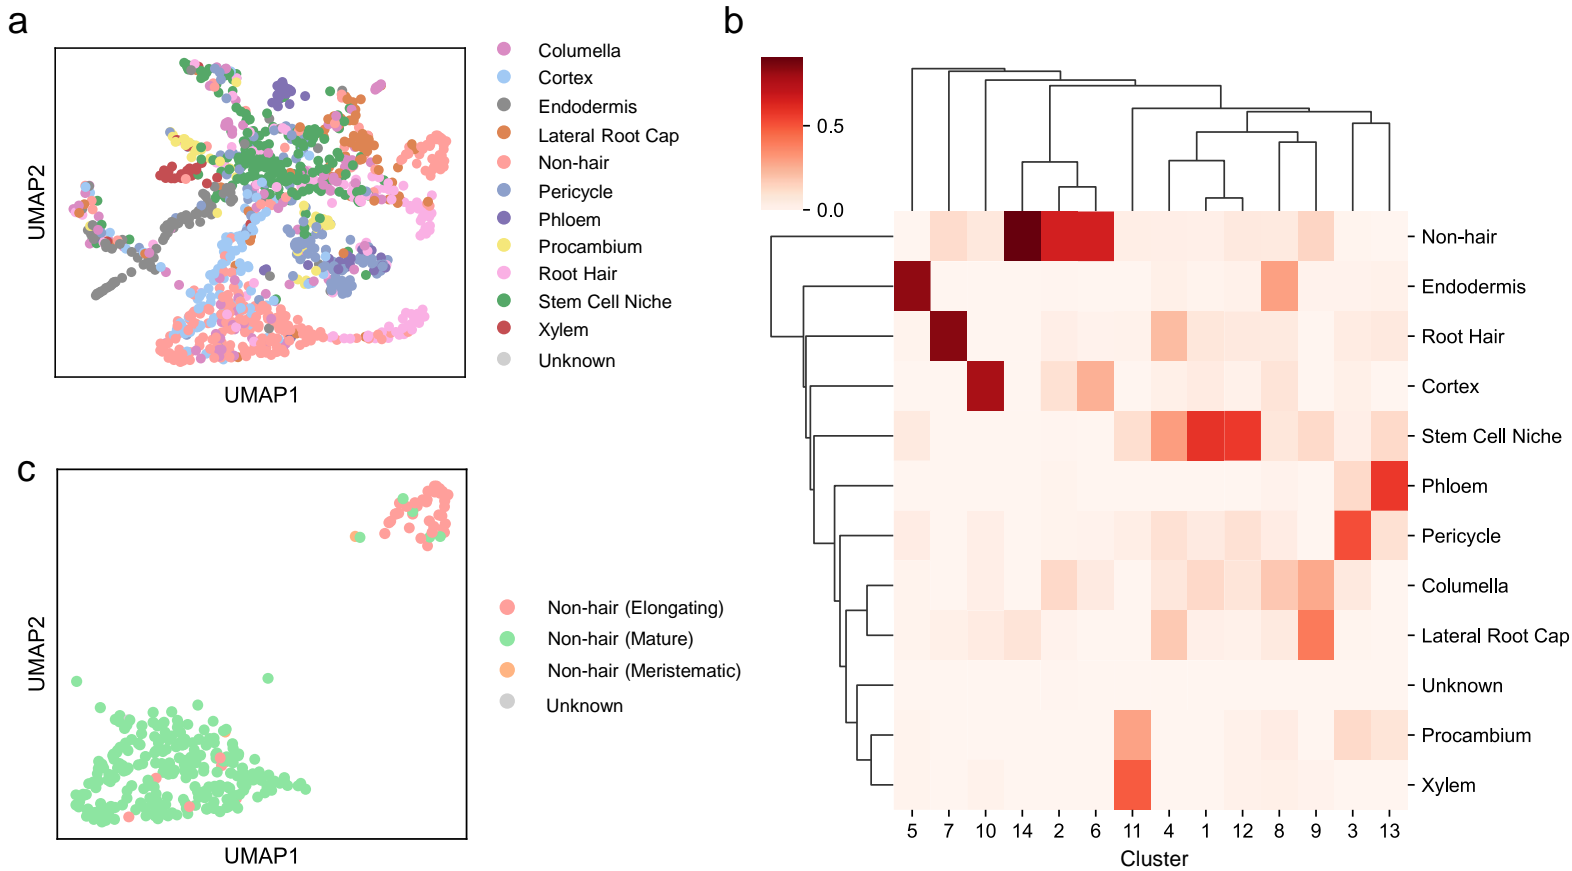

**Supplemental Figure 4. Identification of clusters by a marker-gene-based method.** We calculate the cell score[41] for each cell based on type-specific genes[17]. Cells are classified as the type with the highest cell score. **a**, UMAP visualization of the 1186 cells. Colors denote corresponding cell types. **b**, Heatmap visualization of the proportion of cell types in each cluster. **c**, UMAP visualization of the cells within cluster 2, cluster 6, cluster 14. The developmental stage specific genes of non-hair cells are used to calculate the cell score and annotate each cell.

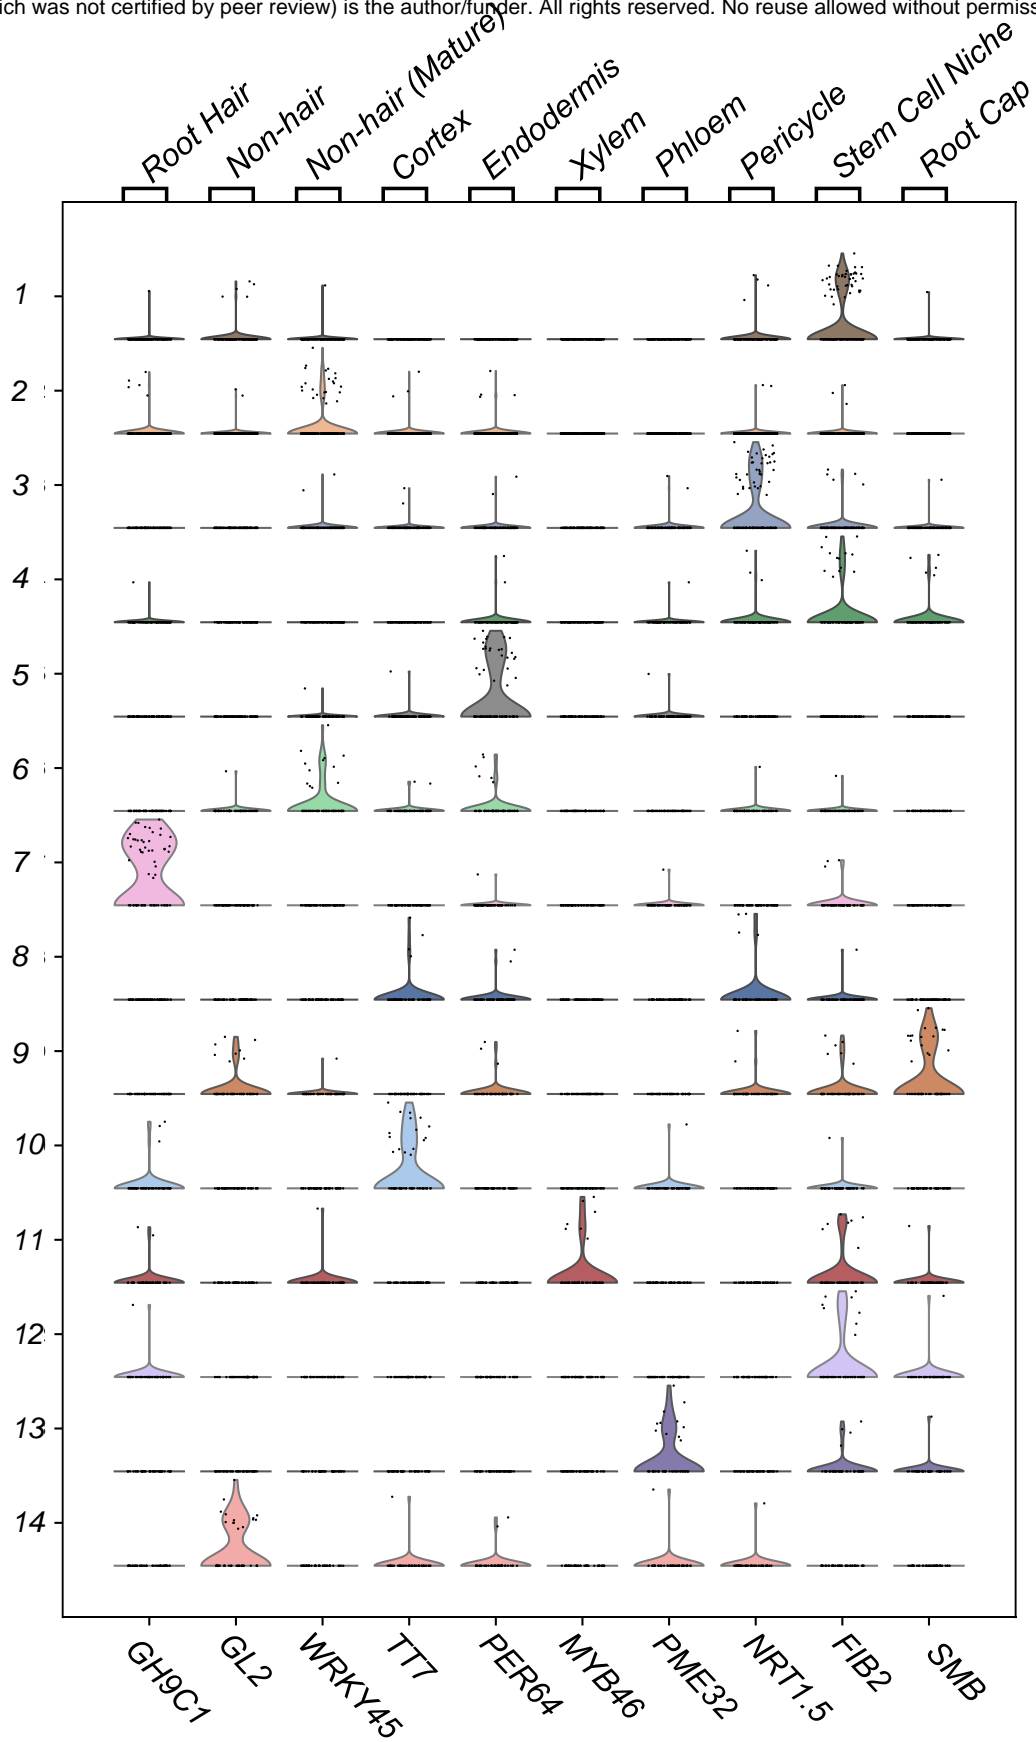

**Supplemental Figure 5. Violin plots showing the expression levels of previously reported cell type specific marker genes in 14 clusters.**



(Root Hair)

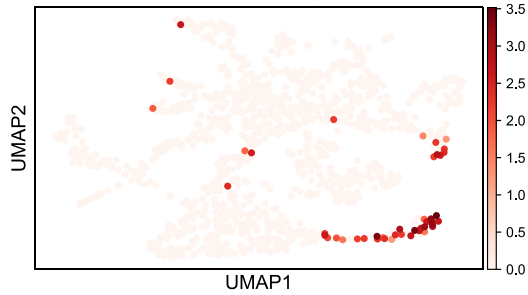

(Non-hair)

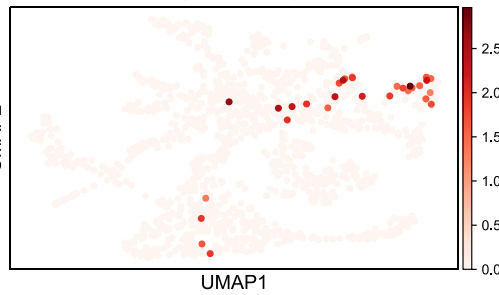

(Mature Non-hair)

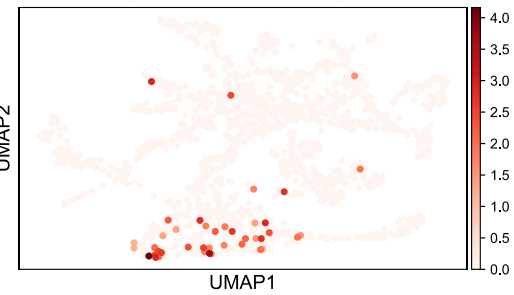

*TT7*

(Cortex)

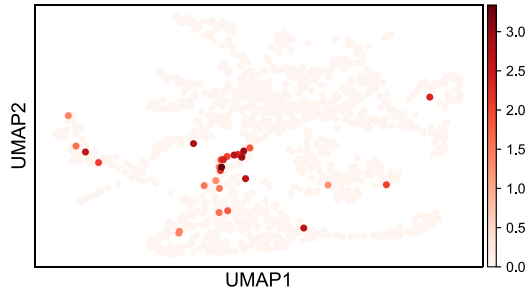

*PER64*

(Endodermis)

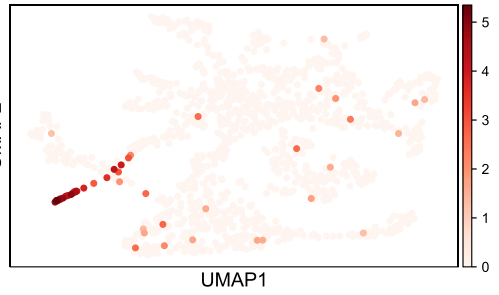

*MYB46*

(Xylem)

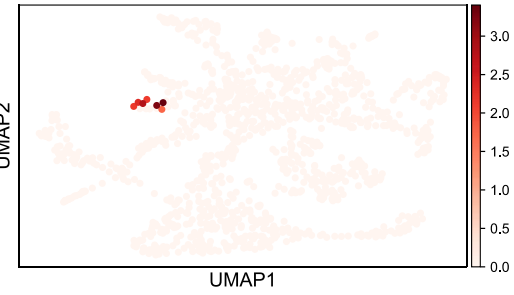

*PME32*

(Phloem)

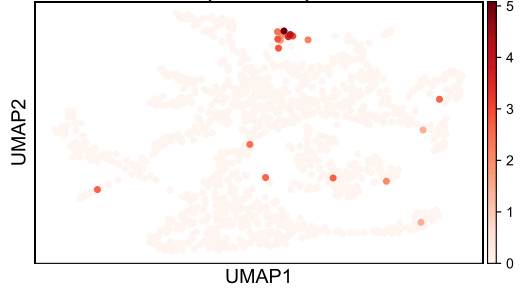

*NRT1.5*

(Pericycle)

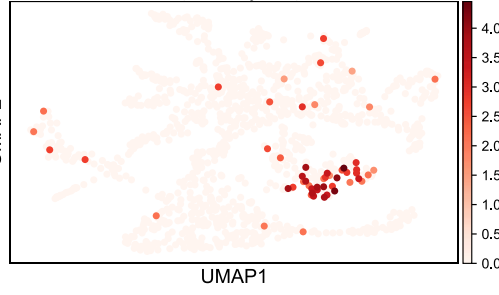

*FIB2*

(Stem Cell Niche)

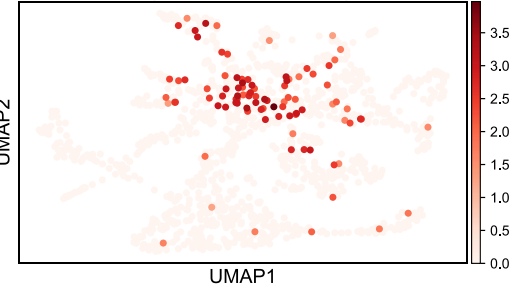

*SMB*

(Root Cap)

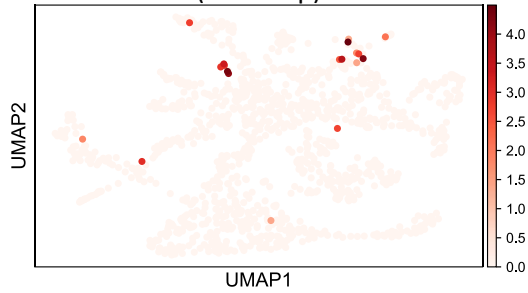

**Supplemental Figure 6. UMAP visualization of the representative cell-type marker genes for each of the 14 cell clusters.** The cell clusters and UMAP visualization are the same as those shown in Figure 1c. Color intensity indicates the relative expression level.

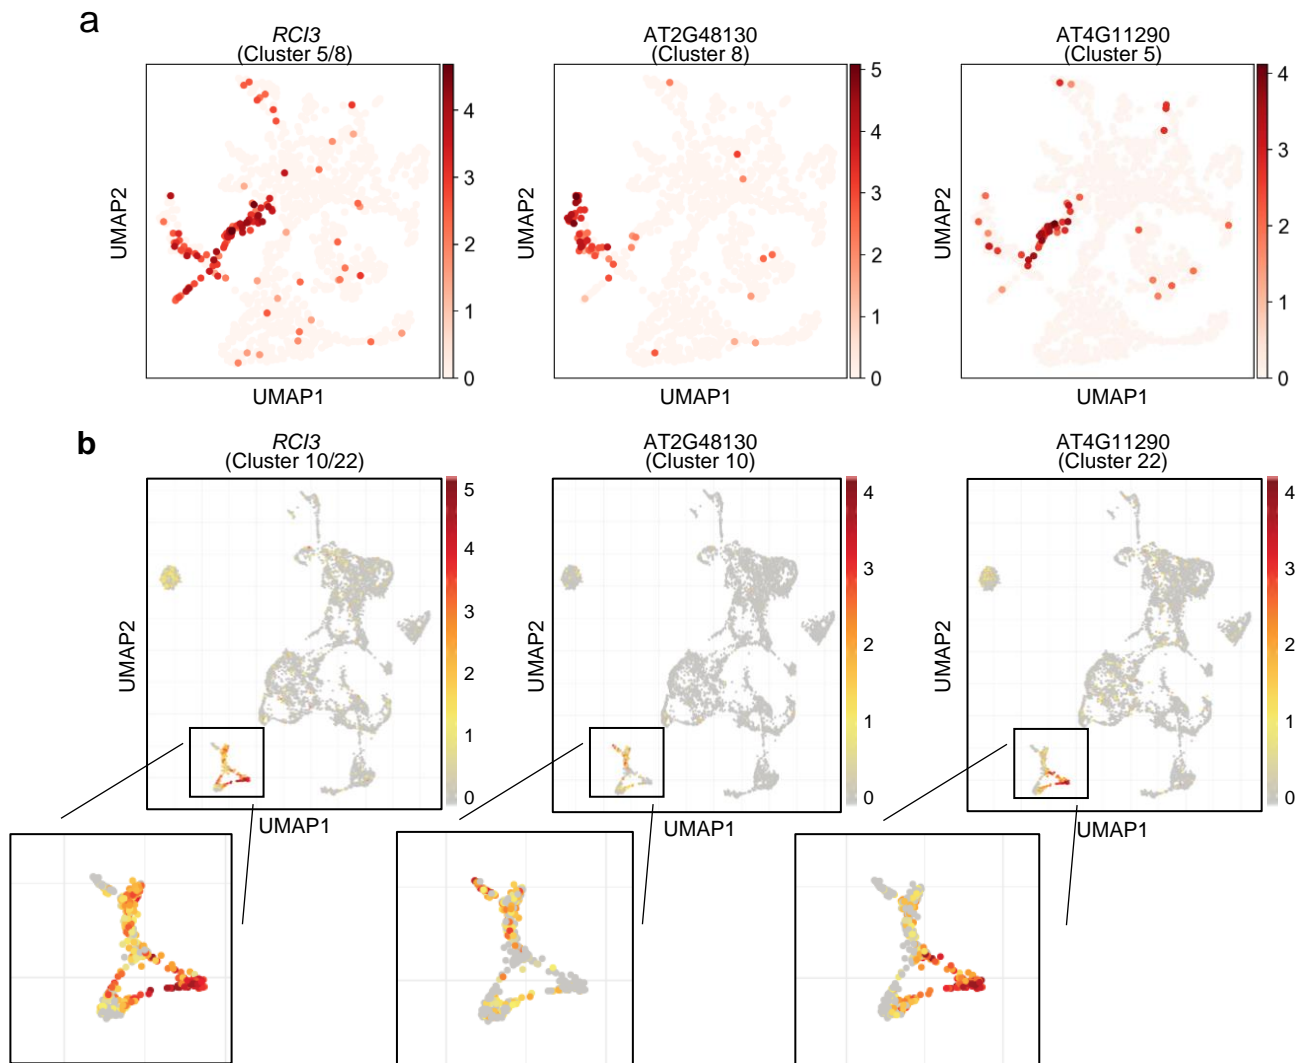

**Supplemental Figure 7. UMAP visualization showing the abundances of representative marker genes in two subcell types of endodermis.** The protoplasting-free single-nucleus RNA-seq data (a) can also accurately identify the subtypes as previously published protoplasting-based single-cell RNA-seq data (b)[15].

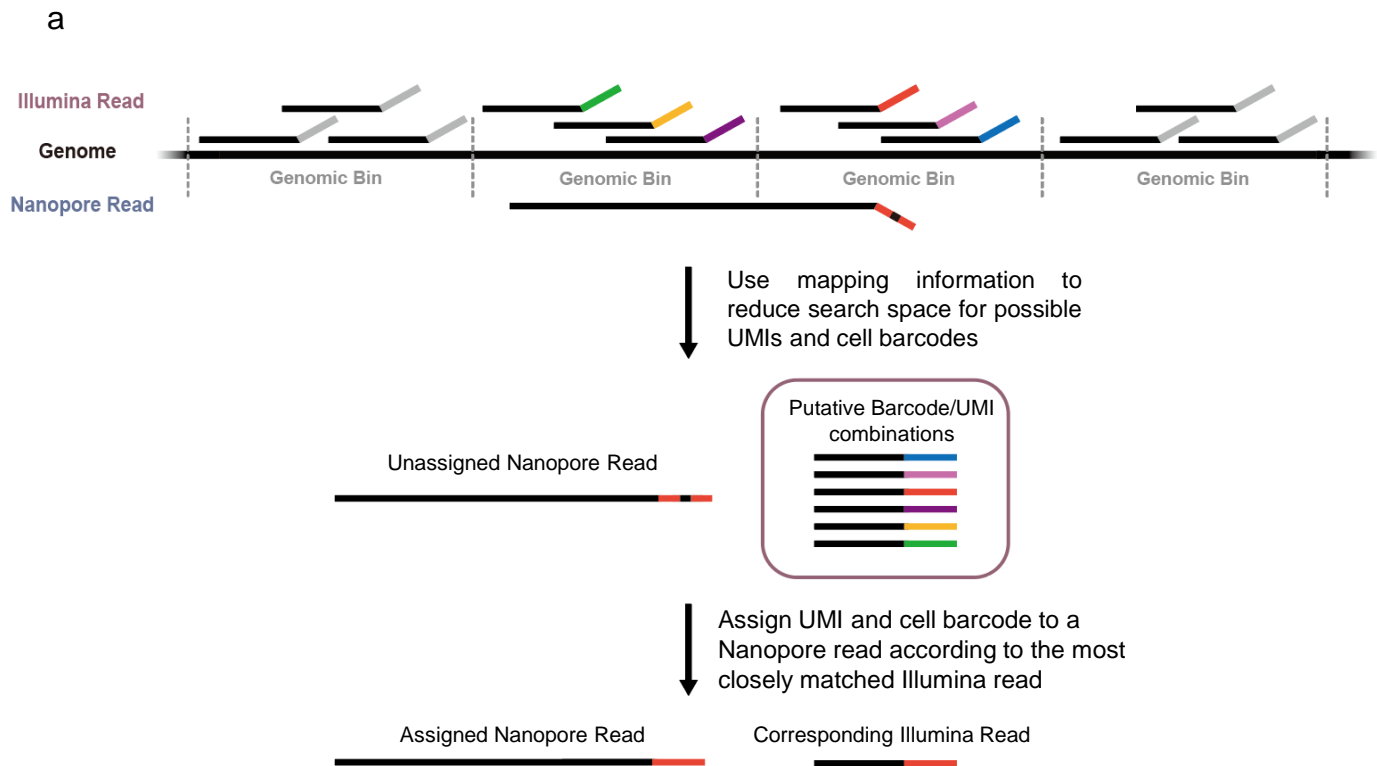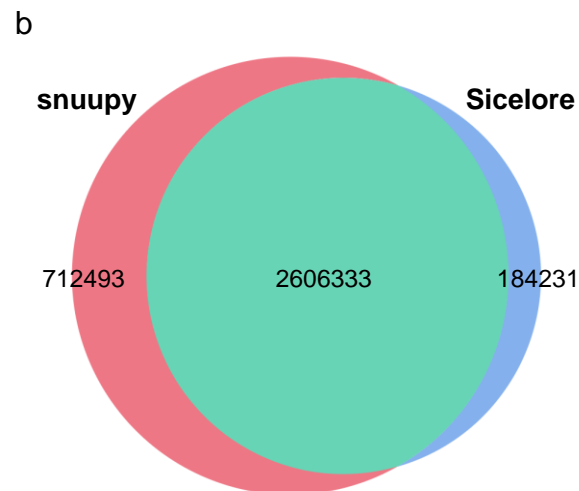

**Supplemental Figure 8. Snuupy assigns cell barcodes and UMIs for Nanopore reads according to the information from Illumina data. a,** Snuupy uses mapping information to reduce the search space as previously reported in Sichelore. **b,** Overlap between snuupy and Sichelore allocated reads.

### Reads splicing information

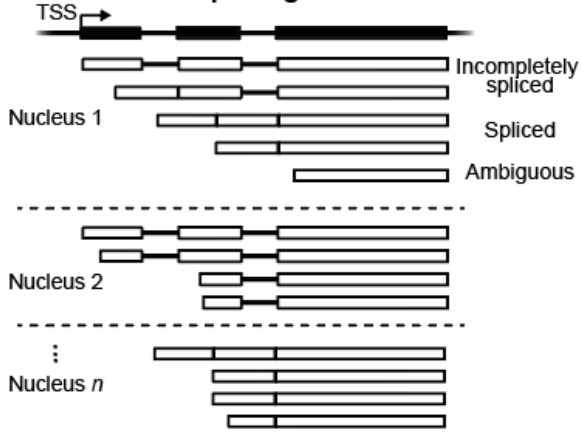

### Nanopore splicing matrix

|             | Gene 1  |                      | Gene 2  |                      | Gene $m$ |                      |
|-------------|---------|----------------------|---------|----------------------|----------|----------------------|
|             | Spliced | Incompletely spliced | Spliced | Incompletely spliced | Spliced  | Incompletely spliced |
| Nucleus 1   | 2       | 3                    | 2       | 3                    | 0        | 0                    |
| Nucleus 2   | 4       | 2                    | 3       | 0                    | 1        | 2                    |
| Nucleus 3   | 2       | 3                    | 3       | 1                    | 3        | 4                    |
| ⋮           |         |                      |         |                      |          |                      |
| Nucleus $n$ | 1       | 4                    | 3       | 3                    | 0        | 0                    |

### Reads APA information

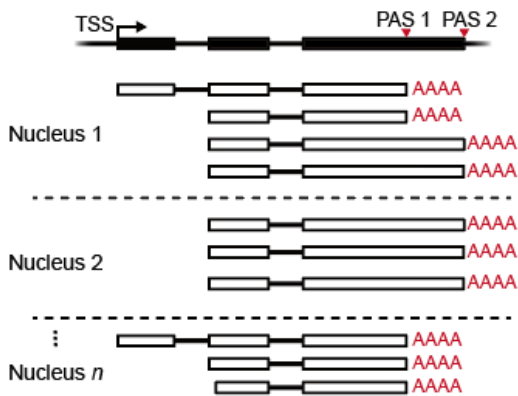

### Nanopore APA matrix

|             | Gene 1 |       |       | Gene 2 |       | Gene $m$ |       |
|-------------|--------|-------|-------|--------|-------|----------|-------|
|             | PAS 1  | PAS 2 | PAS 3 | PAS 1  | PAS 2 | PAS 1    | PAS 2 |
| Nucleus 1   | 2      | 3     | 0     | 1      | 3     | 0        | 0     |
| Nucleus 2   | 3      | 2     | 0     | 1      | 4     | 5        | 0     |
| Nucleus 3   | 3      | 1     | 1     | 2      | 3     | 6        | 1     |
| ⋮           |        |       |       |        |       |          |       |
| Nucleus $n$ | 2      | 1     | 1     | 0      | 1     | 4        | 1     |

**Supplemental Figure 9. Scheme for deriving the splicing and APA matrices from Nanopore data.**
